# Supplementary material for: Cubic POSS engineering of photosensitizer-doped semiconducting polymer nanoparticles for enhanced fluorescence imaging and amplified photodynamic therapy
Source: Royal Society of Chemistry journal article supplement (doi:10.1039/d0py01199a), 2020-01-01
Supplement: d0py01199a1.pdf [file d0py01199a1.pdf]

## Electronic Supplementary Information

*for*

### Cubic POSS Engineering of Photosensitizer-Doped Semiconducting Polymer Nanoparticles for Enhanced Fluorescence Image and Amplified Photodynamic Therapy

Biqing Bao<sup>†, a</sup>, Xue Zhai<sup>†, a</sup>, Tianqi Liu<sup>a</sup>, Peng Su<sup>a</sup>, Luyao Zhou<sup>a</sup>, Yu Xu<sup>a</sup>, Bingbing Gu<sup>a</sup>, Lianhui  
Wang<sup>\*, a</sup>

<sup>a</sup> Key Laboratory for Organic Electronics and Information Displays & Jiangsu Key Laboratory for Biosensors, Institute of Advanced Materials (IAM), Jiangsu National Synergetic Innovation Center for Advanced Materials (SICAM), Nanjing University of Posts & Telecommunications, 9 Wenyuan Road, Nanjing 210023, China.

#### Contents in electronic supplementary information:

1. Supplemental Figures
  - 1.1. **Figure S1.** <sup>1</sup>H NMR spectrum of PorPOSSC<sub>12</sub>.
  - 1.2. **Figure S2.** UV-visible spectra of THPP, PFO and PFBT.

---

<sup>†</sup> These authors contributed equally to the paper.

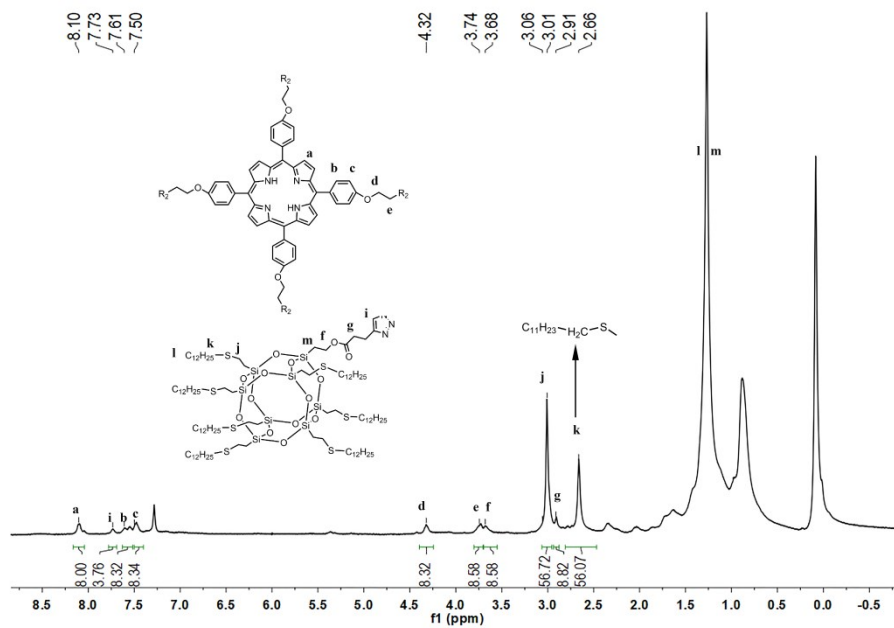

**Figure S1** <sup>1</sup>H NMR spectrum of PorPOSSC<sub>12</sub>

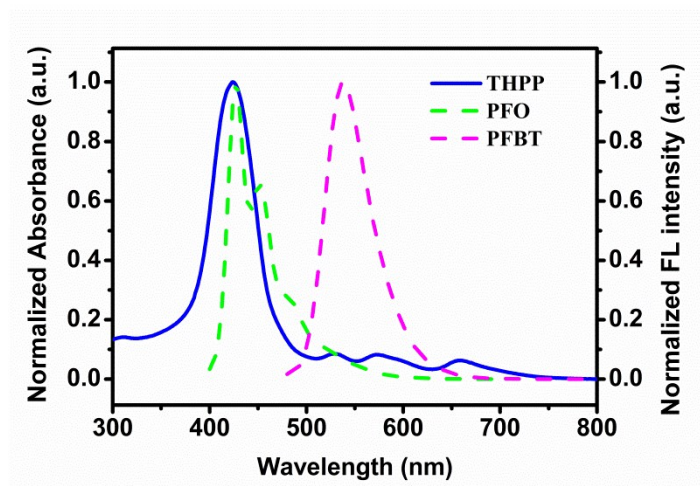

**Figure S2** UV-visible spectra of THPP and Fluorescence spectra of PFO NPs and PFBT NPs.
